# Supplementary material
Source: Royal Society of Chemistry journal article supplement (doi:10.1039/d6ma00481d)
Supplement: d6ma00481d1.pdf [file d6ma00481d1.pdf]

## Supplementary Information

### On the magnetocaloric effect in biphasic FeCrSiB amorphous composites

Alba Sanz-Prada<sup>a,b</sup>, Javier López-García<sup>\*a,c</sup>, Kenny Padrón-Alemán<sup>a,b</sup>, Jose M. Porro<sup>d,e</sup>, José L. Sánchez Llamazares<sup>f</sup>, Jesús A. Blanco<sup>a</sup>, Pedro Gorria<sup>†a,c</sup>, and Pablo Álvarez-Alonso<sup>a,c</sup>

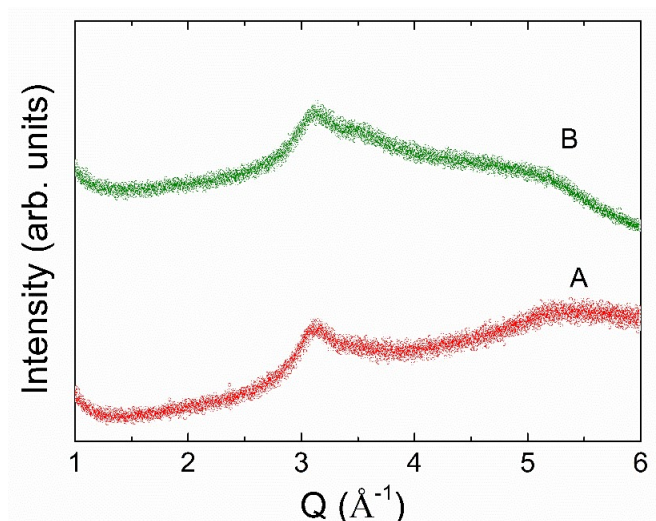

Fig. S1 Room-temperature X-ray diffraction patterns of ribbons A (lower pattern, red points) and B (upper pattern, green points). The patterns are shifted vertically for clarity. The broad humps centered above  $Q = 3.2$  and  $6.5 \text{ \AA}^{-1}$  confirm the amorphous nature of both samples. The absence of sharp crystalline reflections indicates a fully amorphous structure.

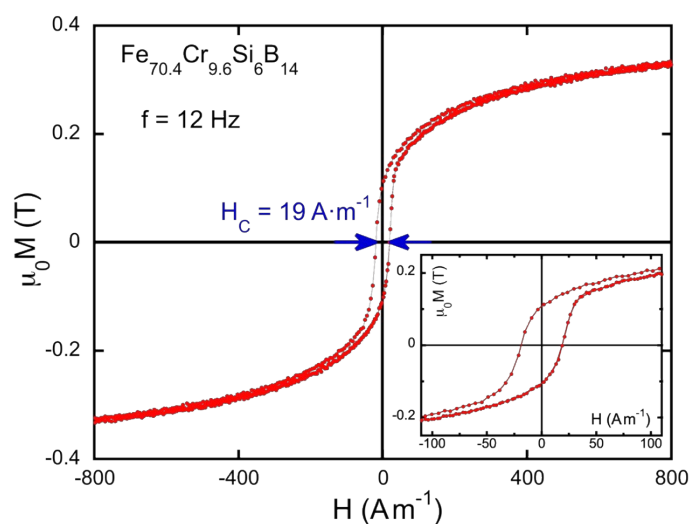

Fig. S2 Room-temperature magnetic hysteresis loop ( $\mu_0 M$  vs  $H$ ) for ribbon A measured under quasi-static conditions. The main panel displays the full loop, confirming ferromagnetic order with a remanence of 0.19 T. The inset shows a magnified view of the low-field region from which a coercive field  $H_c = 19 \text{ A}\cdot\text{m}^{-1}$  is determined. The narrow loop width and low coercivity are characteristic of soft magnetic materials.

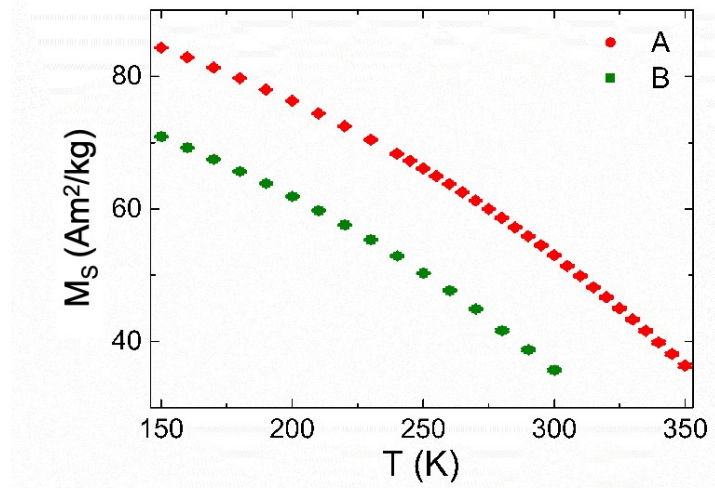

Fig. S3 Saturation magnetization ( $M_s$ ) as a function of the temperature for ribbons A (red symbols) and B (green symbols) estimated from an approach-to-saturation law from  $M(\mu_0H)$  curves under an applied magnetic field up to  $\mu_0H = 8$  T. Both curves exhibit a monotonic decrease of  $M_s$  with increasing temperature, typical of a second-order magnetic phase transition.

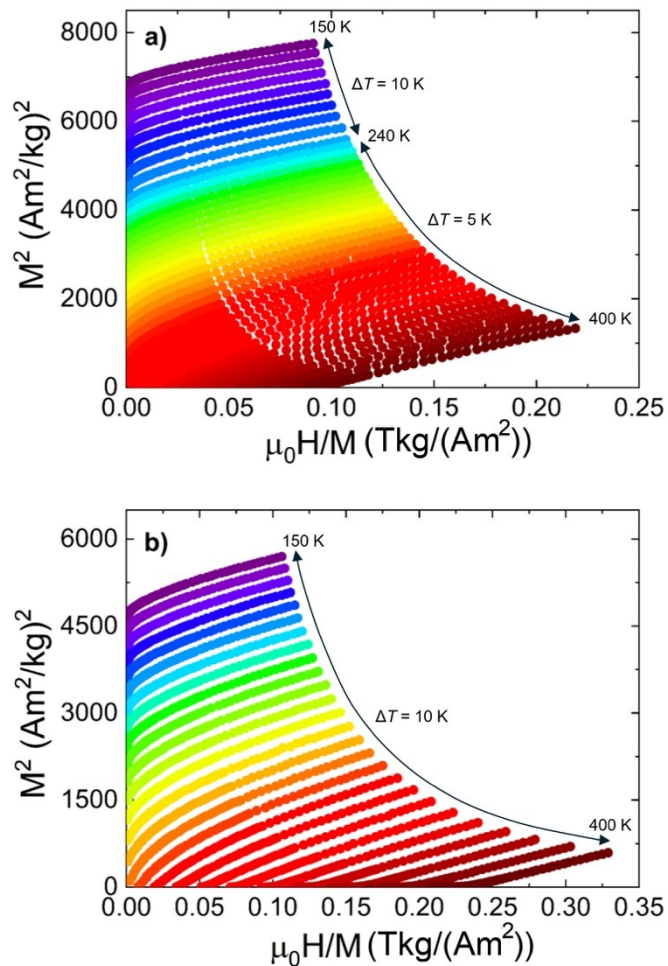

Fig. S4 Standard Arrott plots ( $M^2$  vs  $\mu_0H/M$ ) constructed from isothermal magnetization curves  $M(H)$  measured within the temperature range from 150 K to 400 K in steps of 5 or 10 K for ribbons a) A and b) B. The positive slope of all curves confirms the second-order nature of the magnetic phase transition. The linear extrapolation of the high-field region allows the determination of the spontaneous magnetization and the inverse initial susceptibility.

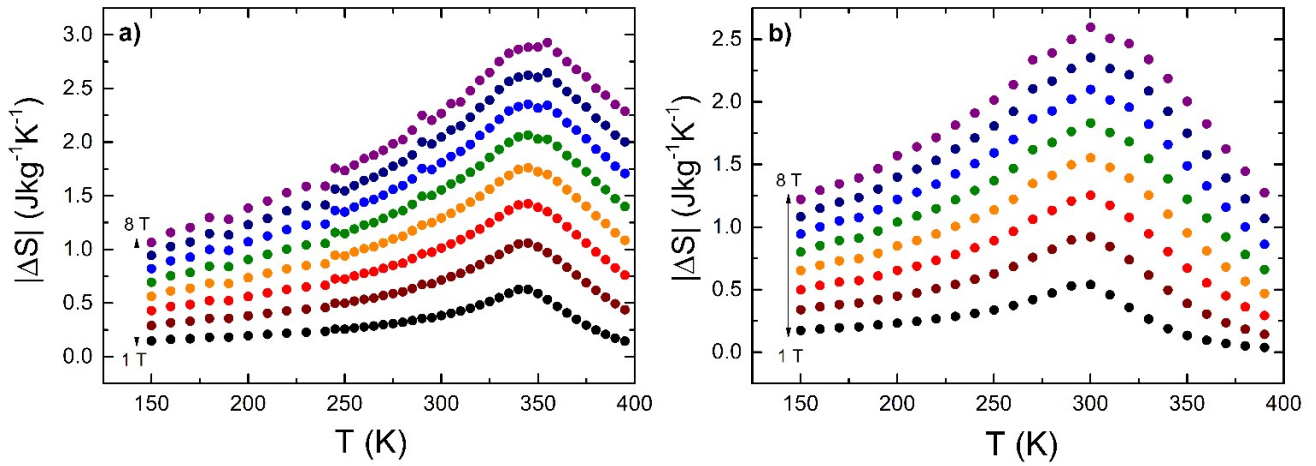

Fig. S5 Temperature dependence of the isothermal magnetic entropy change ( $|\Delta S|$ ) for a) ribbon A and b) ribbon B, derived from isothermal  $M(\mu_0 H)$  data for magnetic field changes from 1 up to 8 T in steps of 1 T. The maximum entropy change occurs near the respective values of the Curie temperature ( $T_c = 340$  and  $290$  K for ribbons A and B, respectively). The entropy peak height increases with the value of the magnetic field change, while the broad shape of the curves confirms the second-order nature of the transition. These data are used to design a composite with a table-like magnetocaloric response (see main text).

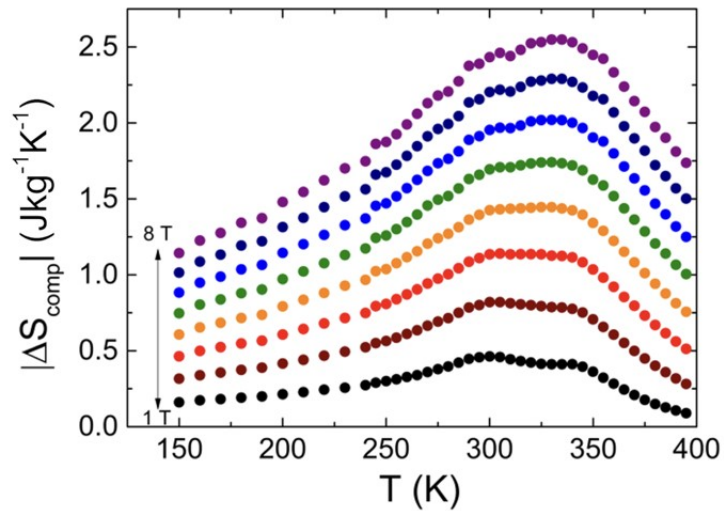

Fig. S6 Temperature dependence of the isothermal magnetic entropy change for the composite ( $|\Delta S_{comp}|$ ) with  $\alpha = 0.5$  (equal weight mixture of ribbons A and B) measured under applied magnetic field changes from 1 up to 8 T in steps of 1 T. The composite exhibits a broad table-like plateau over approximately 50 K, ranging from about 290 K to 340 K, which corresponds to the Curie temperature of the two precursor alloys. This “plateau-like” behavior confirms the successful design of a composite magnetocaloric material with a nearly constant entropy change over a wide temperature span.

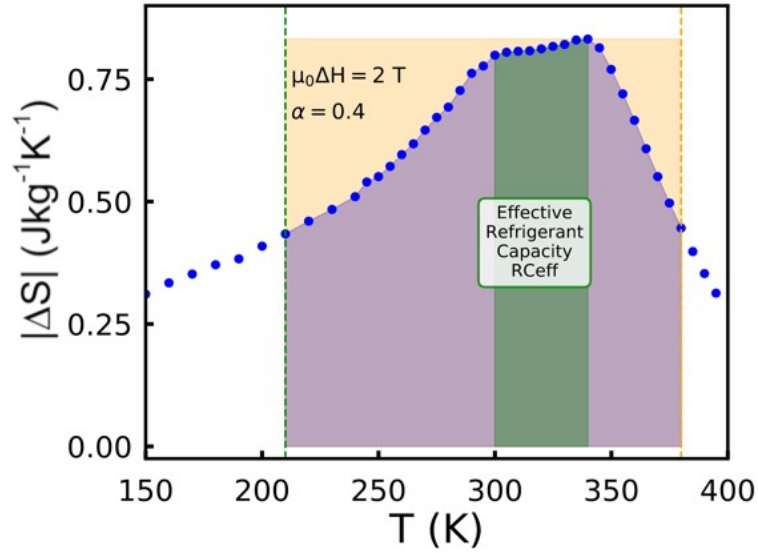

Fig. S7 Temperature dependence of the isothermal magnetic entropy change for the composite ( $|\Delta S_{\text{comp}}|$ ) for the optimized weight-fraction  $\alpha = 0.4$  under  $\mu_0\Delta H = 2$  T. The green shaded area denotes the effective refrigerant capacity, while the orange and purple areas represent RC-1 and RC-2, respectively. The dashed vertical lines mark the cold  $T_{\text{cold}}$  (green) and hot  $T_{\text{hot}}$  (orange) operating temperatures. The broad plateau in  $|\Delta S_{\text{comp}}|$  highlights the effectiveness of the composite design in delivering a table-like magnetocaloric response (see text for more details).

### Experimental methods

Magnetic hysteresis loops were measured by the induction method using an alternating magnetic-field with frequency of 12 Hz.

### Numerical calculations

The uncertainty of the magnetic entropy change was estimated to be  $\sim 20\%$ , in accordance with Ref. S1. Uncertainty propagation for  $TEC$  was performed using a Monte Carlo approach. Specifically, the  $\Delta S_{\text{comp}}(T)$  dataset was perturbed using Gaussian noise within the assigned uncertainty at each point. For each perturbed dataset,  $TEC$  were recalculated following the same numerical procedure (interpolation and integration). This process was repeated at least  $\sim 200$  times. The final values were then obtained as the average of the resulting distribution, while the associated uncertainty was taken as the corresponding standard deviation.

### References:

[S1] V. K. Pecharsky and K. A. Gschneidner, *J. Appl. Phys.*, 1999, **86**, 565.
